# Supplementary material
Source: publisher site journal article supplement (https://www.dovepress.com/article/282600)
Supplement: Supplementary file 1 [file get_supplementary_file.php]

**Supplement**

**Search terms for literature review**

**[Checkpoint inhibitors] and [Arthritis or PMR or arthralgia] Not [case report] - 11/12/21 572 results**

((((immun*[tw] AND checkpoint[tw] AND (inhibitor*[tw] OR modulator*[tw] OR antibod*[tw] OR block*[tw])) OR "cancer Immunotherapy"[tw] OR "Programmed Cell Death 1 Ligand 2 Protein"[Mesh] OR "Programmed Cell Death 1 Receptor"[Mesh] OR "Antineoplastic Agents, Immunological"[Mesh:NoExp] OR "programmed cell death 1"[TW] OR "PD1"[tw] OR "PD 1"[tw] OR "checkpoint inhibitor"[tw] OR "checkpoint inhibitors"[tw] OR (ipilimumab[tw] OR "MDX CTLA 4"[tw] OR Yervoy[tw] OR "MDX 010"[tw] OR MDX010[tw] OR "ipilimumab"[MeSH Terms]) OR (tremelimumab[tw] OR ticilimumab[tw] OR CP-675,206[tw] OR "CP 675206"[tw] OR CP67520[tw]) OR pembrolizumab[tw] OR Keytruda[tw] OR Lambrolizumab[tw] OR "Merck 3475"[tw] OR Merck3475[tw] OR "MK 3475"[tw] OR MK3475[tw] OR "Sch 900475"[tw] OR Sch900475[tw] OR (nivolumab[tw] OR "BMS 936558"[tw] OR BMS936558[tw] OR "MDX 1106"[tw] OR MDX1106[tw] OR "ONO 4538"[tw] OR ONO4538[tw] OR Opdivo[tw] OR "nivolumab"[MeSH Terms]) OR (durvalumab[tw] OR "MEDI 4736"[tw] OR MEDI4736[tw] OR Imfinzi[tw]) OR (atezolizumab[tw] OR "Atezolizumabum"[tw] OR "MPDL 3280A"[tw] OR "RG 7446"[tw] OR "RO 5541267"[tw] OR Tecentriq[tw]) OR (Avelumab[tw] OR Avelumabum[tw] OR "MSB0010718C"[tw]) OR "CTLA-4 Antigen"[Mesh] OR "CTLA-4"[tw] OR (("cytotoxic T lymphocyte associated"[tw] AND 4[tw]) OR "CTLA 4"[tw] OR CTLA4[tw]))))

AND

arthritis[Mesh:NoExp] OR arthritis[ti] OR "arthritis, rheumatoid"[Mesh] OR (arthritis[ti] AND rheumatoid[ti]) OR "rheumatoid arthritis"[ti] OR "arthritis, psoriatic"[Mesh] OR (arthritis[ti] AND psoriatic[ti]) OR "psoriatic arthritis"[ti] OR Oligoarthritis[ti] OR PMR[ti] OR arthralgia[Mesh] OR arthralgia[ti] OR rheumatic[ti]

NOT "case reports"[Publication Type] OR case report[ti] OR case reports[ti]

NOT (animals[mesh] NOT humans[mesh]) AND "English"[Language]

**Supplemental Table 1: Case series with patient level data**

| Author/Year | cancer | N | ICI Regimen (n) | Arthritis Type (n) | IA Steroid (n) | NSAID (n) | Systemic steroid (n) | Pred Dose Range | Pred Dose Mean | cs-DMARD (n) | Biologic (n) |
| --- | --- | --- | --- | --- | --- | --- | --- | --- | --- | --- | --- |
| Belkhir 2017 | Mixed | 10 | PD(L)1: 9 Combo: 1 | RA (6) |  | 2 | 3 | 10-15 mg | 11.7 mg | HCQ (2) MTX (1) |  |
|  |  |  |  | PMR (4) |  |  | 4 | 20-60 | 35 |  |  |
| Calabrese 2017 | Mixed | 10 | PD(L)1: 3 Combo: 7 | Arthritis (7) |  |  | 7 | 15-60 | 33 | HCQ (1) MTX (2) | Infliximab 1 Adalimumab 1 Etanercept 2 |
|  |  |  |  | PMR (3) |  |  | 3 | 20-40 | 30 |  | Infliximab 1 |
| Cappelli 2017 | Mixed | 9 | PD(L)1: 2 Combo: 7 | Arthritis (9) | 5 | 1 | 8 | 10-120 | 49.2 | MTX (2) | Infliximab 2 Adalimumab 3 Etanercept 1 |
| Leipe 2018 | Mixed | 14 | PD(L)1: 10 Combo: 4 | Arthritis (9) | 8 | 2 | 3 |  |  | MTX (3) SSZ (1) |  |
|  |  |  |  | Arthritis +PMR (5) |  |  | 5 |  |  | MTX (3) |  |
| Roberts 2019 | Mixed | 11 | PD(L)1: 10 Combo: 1 | Arthritis | 6 |  | 5 |  |  | HCQ (11) HCQ + MTX (1) |  |
| Smith 2019 | Mixed | 10 | PD(L)1: 3 Combo: 7 | Arthritis | 5 | 1 | 10 | 10-60 mg | 26.5 | HCQ (1) MTX (1) SSZ (1) MMF (1) | Infliximab 1 |
| Subedi 2020 | Mixed | 8 | PD(L)1: 7 Combo: 1 | Arthritis | 3 | 2 | 5 | 20 up to 1 mg/kg |  | MTX (1) |  |
| Lee 2019 | Mixed | 11 | PD(L)1: 10 Combo: 1 | Arthritis |  | 1 | 7 | 5-80 mg | 32.9 |  | Adalimumab 1 |
| Lidar 2018 | Mixed | 12 | PD(L)1: 10 Combo: 2 | Arthritis |  | 10 | 12 |  |  | MTX (7) |  |
| Mooradian 2019 | Mixed | 18 | PD(L)1: 13 CTLA4: 3 Combo: 2 | Arthritis (14) | 4 |  | 12 | 6-60 mg | 31.1 | HCQ (7) MTX (1) SSZ (5) | Tocilizumab 1 |
|  |  |  |  | PMR (4) |  |  | 4 | 6-15 mg | 10.5 |  |  |
| Verspohl 2021 | Mixed | 16 | PD(L)1: 14 Combo: 1 | Arthritis (7) |  |  | 7 | 15-80 mg |  | MTX (3) | Tocilizumab 1 |
|  |  |  |  | Arthralgia (9) |  | 5 | 6 |  |  |  |  |
| Mitchell 2018 | Mixed | 20 | PD(L)1: 17 Combo: 3 | Arthritis (18) PMR (2) |  |  | 16 |  |  | HCQ (4) MTX (2) SSZ (2) |  |
| Calabrese 2019 | Mixed | 20 | PD(L)1: 17 Combo: 3 | PMR (20) | 1 | 1 | 18 | 7.5-60 mg | 22 | HCQ (1) MTX (1) | Tocilizumab 2 |
| van der geest 2020 | Mixed | 6 | PD(L)1: 6 | PMR (6) |  | 1 | 5 | 5-15 mg |  | MTX (1) |  |
| Ceccarelli 2022 | Mixed | 7 | PD(L)1: 7 | Arthritis (7) |  | 2 | 5 | 10-12.5 mg |  | MTX (1) |  |

| Supplemental Table 2: Cohort studies without individual patient level data | | | | | | | | | | |
| --- | --- | --- | --- | --- | --- | --- | --- | --- | --- | --- |
| Author/  Year | Malignancy  N  Design | ICI Regimen  N | Arthritis Type N | NSAID  N | Intra-articular Steroid  N | Systemic Steroid  N | Steroid Dose (mg/d) | csDMARD  N | bDMARD  N | csDMARD plus bDMARD  N |
| Braaten 2019 | Mixed 60  Prospective observational | Combo: 18 Mono CTLA4 or PD(L)1: 42 |  | 18 | 15 | 43 | Median 10 | 13 | TNFi: 5 | 6 |
| Buder-Bakhaya 2018 | Metastatic Cutaneous 26  Retrospective | Combo: 3 PD(L)1: 23 | Arthralgia 11 Arthritis 10  Activated OA 5 | Arthralgia: 9 Arthritis: 6  Activated OA: 4 |  | Arthralgia: 1 Arthritis: 4  Activated OA: 0 | Range: 5-10 | HCQ + SSZ: 1 |  |  |
| Cappelli 2018 | Mixed 30  Retrospective Longitudinal | Combo: 14 PD(L)1: 16 |  |  |  | 24 | Median max: 40 | MTX: 3 | TNFi: 7 |  |
| Chan 2020 | Mixed 42  Prospective observational | Combo: 13 PD(L)1: 29 | Small joint 26 Large joint 4 Arthralgia 7 PMR 5 |  |  | 26 | Median: 13.8 | 15 | 2 | 6 |
| Roberts 2020 | Mixed 117  Retrospective | Combo: 29 PD1(L)1: 74 CTLA4: 1 pharma trial: 12 | Symmetric Polyarthritis 45 Psoriatic Arthritis 2 Oligoarthritis 6 PMR-like 17 Worsening OA 3 Arthralgia/myalgia 15 Tendonitis/Enthesitis 16 | 52/117 | 29 | 76 | Mean max: 57 | HCQ: 26 MTX: 17 MMF: 2 SSZ: 3 Lef: 1 | TNFi: 8 Ritux: 1 |  |
|  | Symmetric Polyarthritis 45 | 1 |  | 25 |  | 16 | TNFi: 1 |
|  | PMR-like 17 |  |  | 15 | Mean max: 30.8 |  |  |
| Kostine 2018 | Mixed 35  Prospective observational | Combo: 5 PD(L)1: 30 | RA-like 7 PMR-like 11 PsA-like 2  Non-inflammatory 15 | PMR: 2  Non-inflammatory: 7 | 1 | PMR: 9 RA-like: 7 | PMR: mean 15  RA-like: max 30 | MTX: 2 |  |  |
| Liu 2020 | Mixed 20  Retrospective Cross-sectional | CTLA4: 1 Combo: 6 PD(L)1: 13 | Polyarthritis Large Joint (4) Polyarthritis Small & Large (11) Oligo/monoarthritis (5) |  |  | 15 | Mean 24.73 | HCQ 2 MTX 1 |  |  |
| Ornsetin 2019 | Genitourinary 21  Retrospective | Combo: 5 PD(L)1: 16 | Myalgia and arthralgia |  |  | 21 | Median 40 mg | MTX 2 HCQ 1 | TNFi: 4 IL6Ri: 6 |  |
| Richter 2019 | Mixed 61  Retrospective | CTLA4: 4 Combo: 2 PD1: 28 | Arthritis (34) |  |  | 26 |  | MTX 3 HCQ 2 AZA 2 SSZ 1 | IL6Ri: 2 |  |
|  |  | Combo: 1 PD(L)1: 3 | PMR (4) | 1 |  | 3 |  |  |  |  |
| De Fremont 2022 | ? 14  Retrospective  Letter | ? | PMR (14) |  |  | 13 |  | MTX 1 | IL6Ri: 1 |  |
| Cunningham-Bussel  2022 | Mixed 226  Case-Control | ? | De novo arthritis 118 |  |  |  |  | HCQ 18  MTX 14  SSZ 14 | TNFi: 17 |  |

Combo = combination anti-CTLA4 plus anti-PD1; Mono= monotherapy; csDMARD = conventional synthetic disease modifying anti-rheumatic drug; bDMARD = biologic synthetic disease modifying anti-rheumatic drug; MTX= methotrexate; HCQ = hydroxychloroquine; AZA = azathioprine; SSZ = sulfasalazine; TNFi = tumor necrosis factor inhibitor; IL6Ri = Interleukin 6 receptor inhibitor.
